# Supplementary figures and images for: Growth, Proliferation and Metastasis of Prostate Cancer Cells Is Blocked by Low-Dose Curcumin in Combination with Light Irradiation
Source: MDPI journal article supplement (doi:10.3390/ijms22189966), 2021-09-15

Protein expression

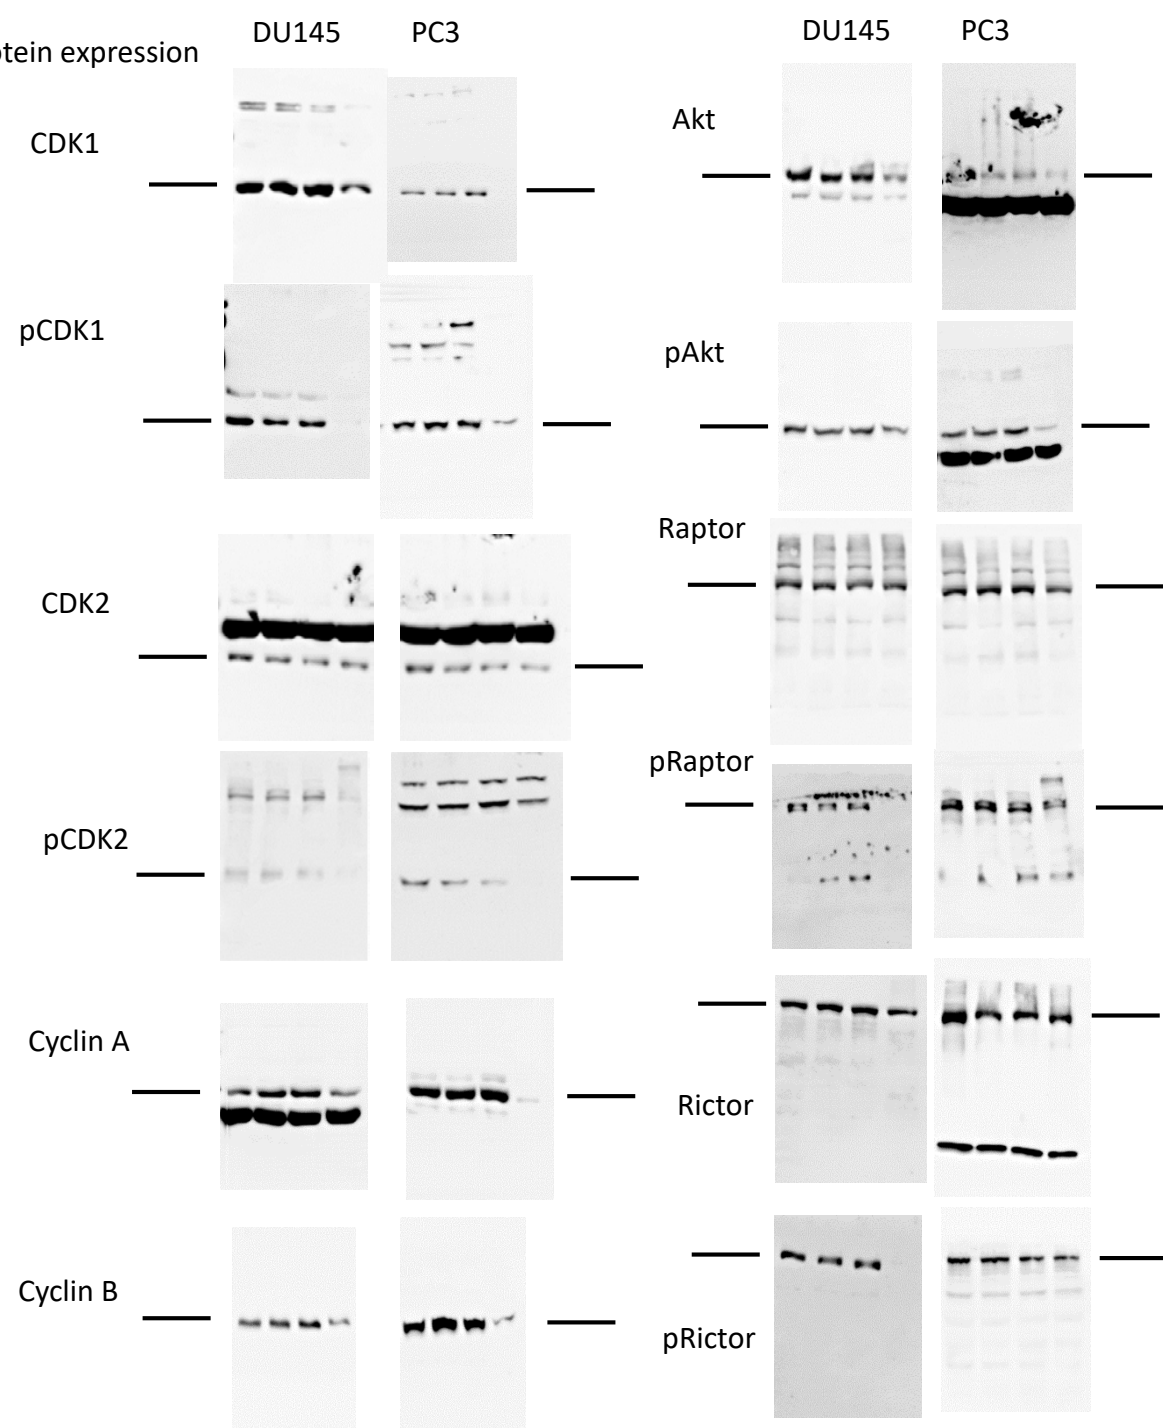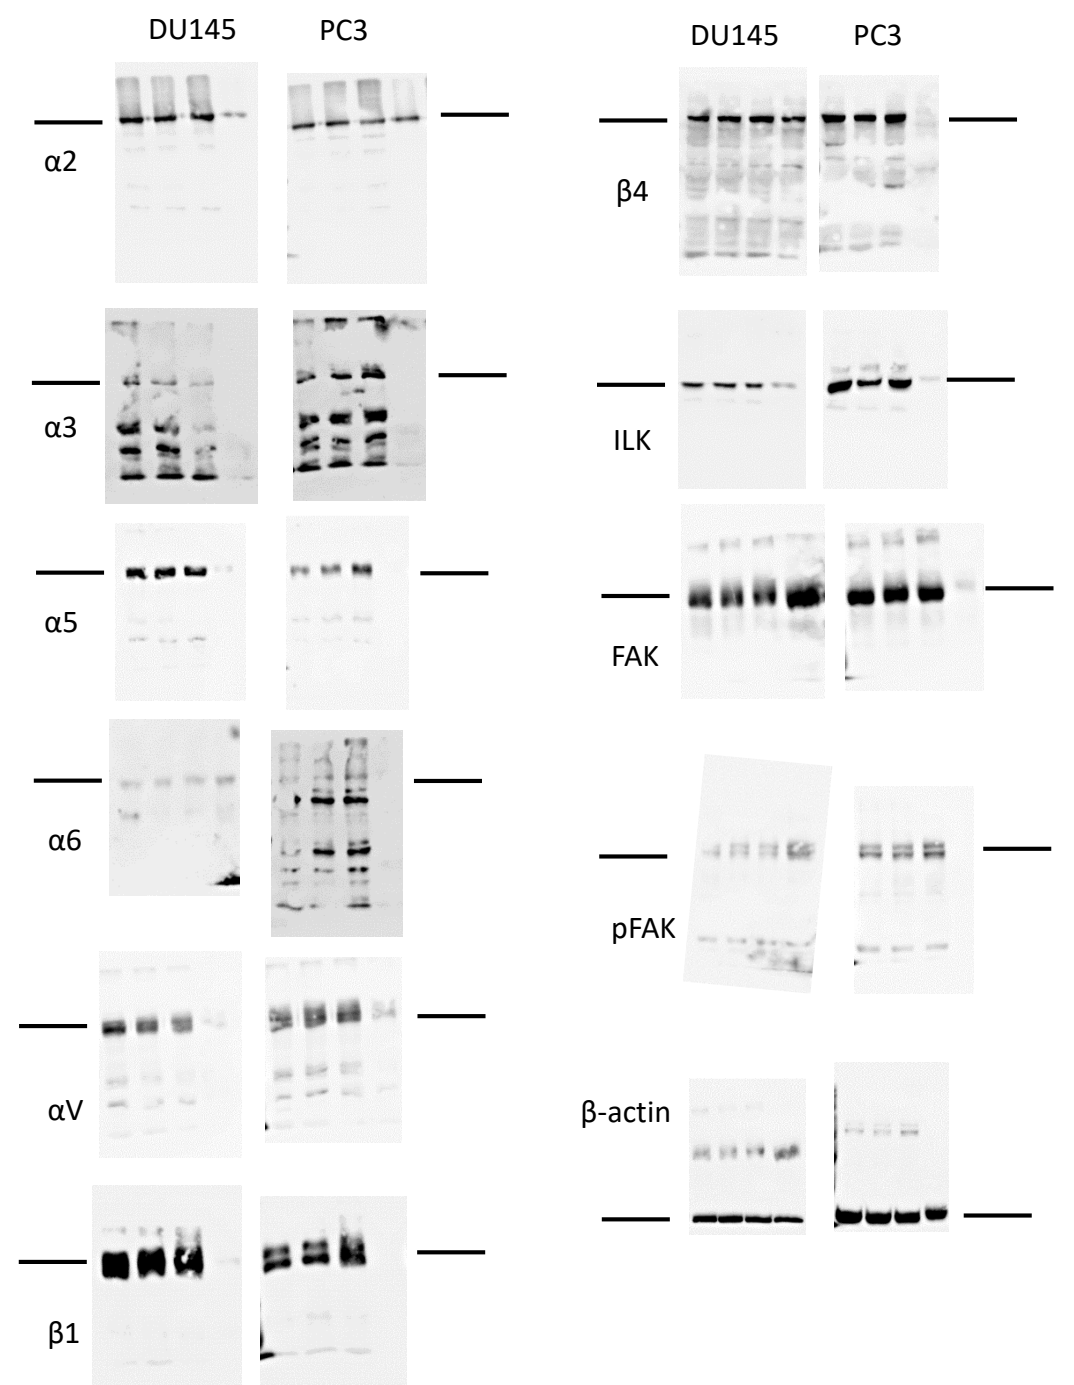

Supplement: s1 [file s1]
